# Supplementary material
Source: PubMed Central journal article supplement (PMC4109158)

## Supplemental data

**Figure S1. The *IKBKE* promoter sequence including exon 1 and intron 1.** Putative STAT3 and NF- $\kappa$ B binding sites are boxed. Transcriptional start site and boundary of exon-1, intron-1 and exon-2 are indicated. Translation initiation site, ATG, was labeled in red. The primers used for preparing different deletion mutants of *IKBKE* promoter are underlined.

**Figure S2. Inhibition of STAT3 reduces *IKBKE* expression.** H157 and OVCAR-3 cells were transfected with STAT3-shRNA (A) or treated with STAT3 inhibitor JSI-124 (B) and then subjected to Western blot and RT-PCR analyses.

**Figure S3. Knockdown of STAT3 decreases STAT3 binding to *IKBKE* promoter.** H292 cells expressing elevated pSTAT3 and *IKBKE* were transfected with STAT3-shRNA and then subjected to ChIP assay.

**Figure S4. Knockdown of STAT3 reduces wild-type but not the mutant *IKBKE* promoter activity.** H292 cells were transfected with indicated shRNA as well as WT- and STAT3-binding site mutation-*IKBKE*-Luc and  $\beta$ -galactosidase. After incubation for 36 hours, luciferase activity was measured and normalized to  $\beta$ -galactosidase.

**Figure S5. Positive correlation of *IKBKE* expression with pSTAT3.** Immunohistochemistry was carried out with antibodies against *IKBKE* and pSTAT3-Y705 in paraffin sections from primary NSCLCs.

**Figure S6. Nicotine and NNK induce *IKBKE*.** H1299 cells were treated with nicotine (A) and NNK (B) for indicated times and then subjected to Western blot analysis.

**Figure S7. NNK induces *IKBKE* promoter activity via STAT3.** A549 cells were transfected with *IKBKE*-Luc together with/without shRNA-STAT3 or treated with/without STAT3 inhibitor. Following exposure to NNK (+ = 0.5  $\mu$ M and ++ = 1.0  $\mu$ M) for 12 hours,

luciferase reporter assay was performed.

**Figure S8. IKBKE mediates nicotine-induced chemoresistance.** H661 cells were transfected with IKBKE-shRNA and then treated with/without nicotine together with/without gemcitabine and cisplatin for 36 hours. Caspase 3/7 activity was assayed.

**Figure S9. Inhibition of NF- $\kappa$ B moderately reduces nicotine-stimulated IKBKE expression and does not compromise STAT3-induced IKBKE.** H1299 cells were treated or transfected with indicated agents (A) or plasmids (B) and then were immunoblotted with indicated antibodies.

Figure S1

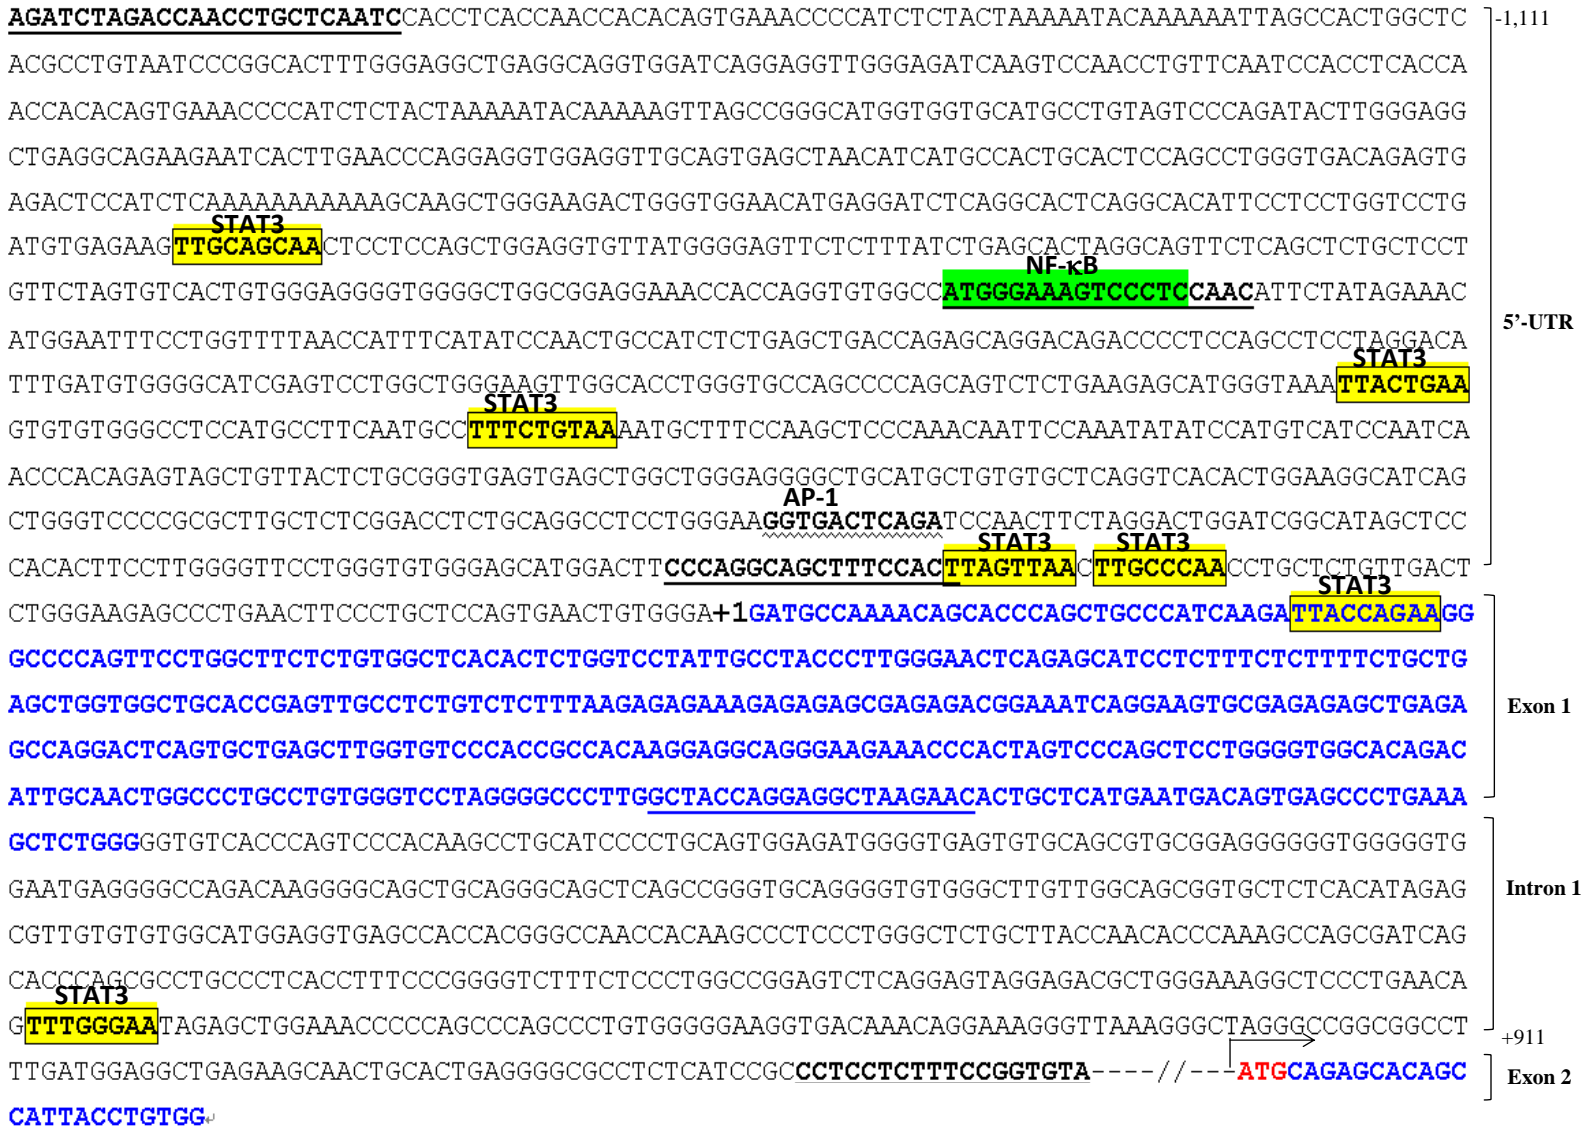

Figure S2

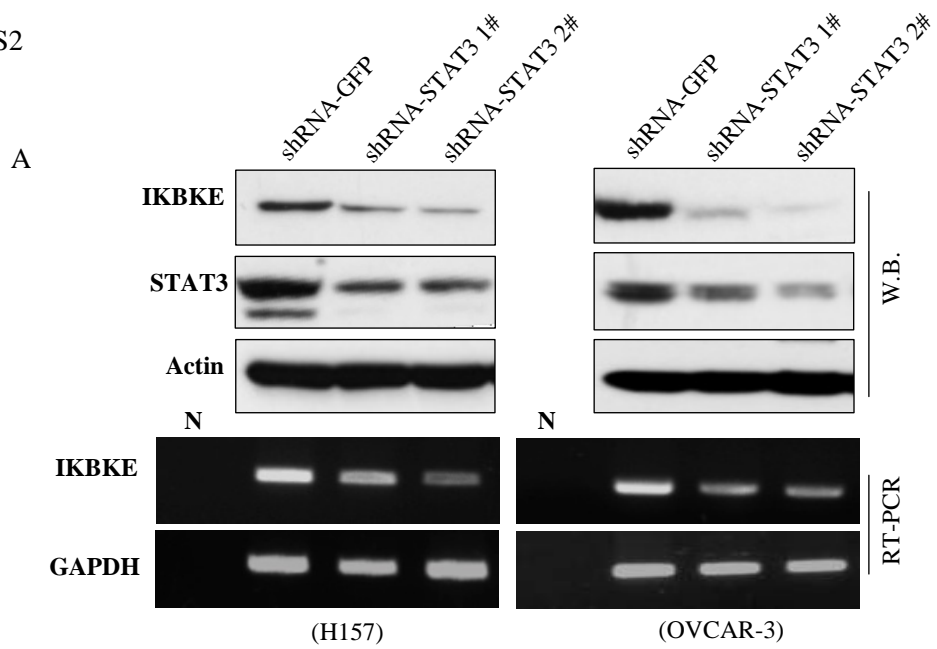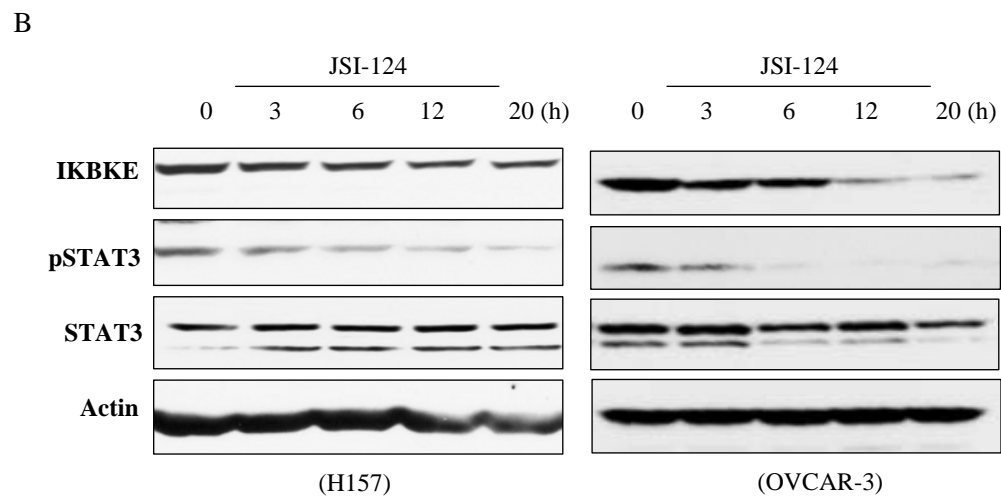

Figure S3

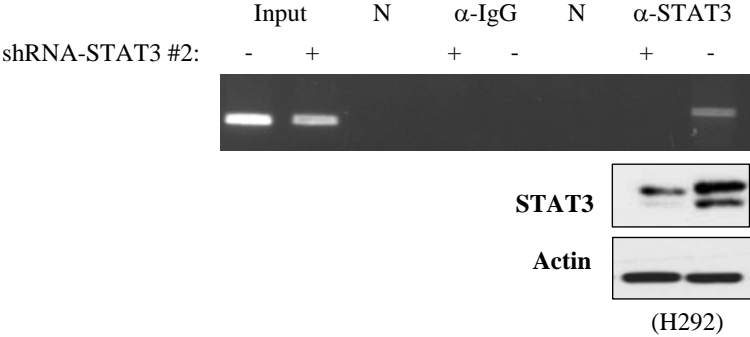

Figure S4

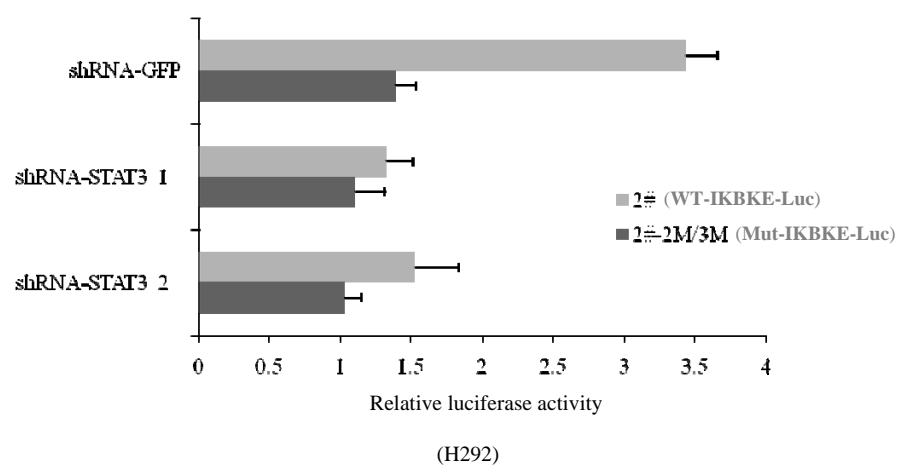

Figure S5

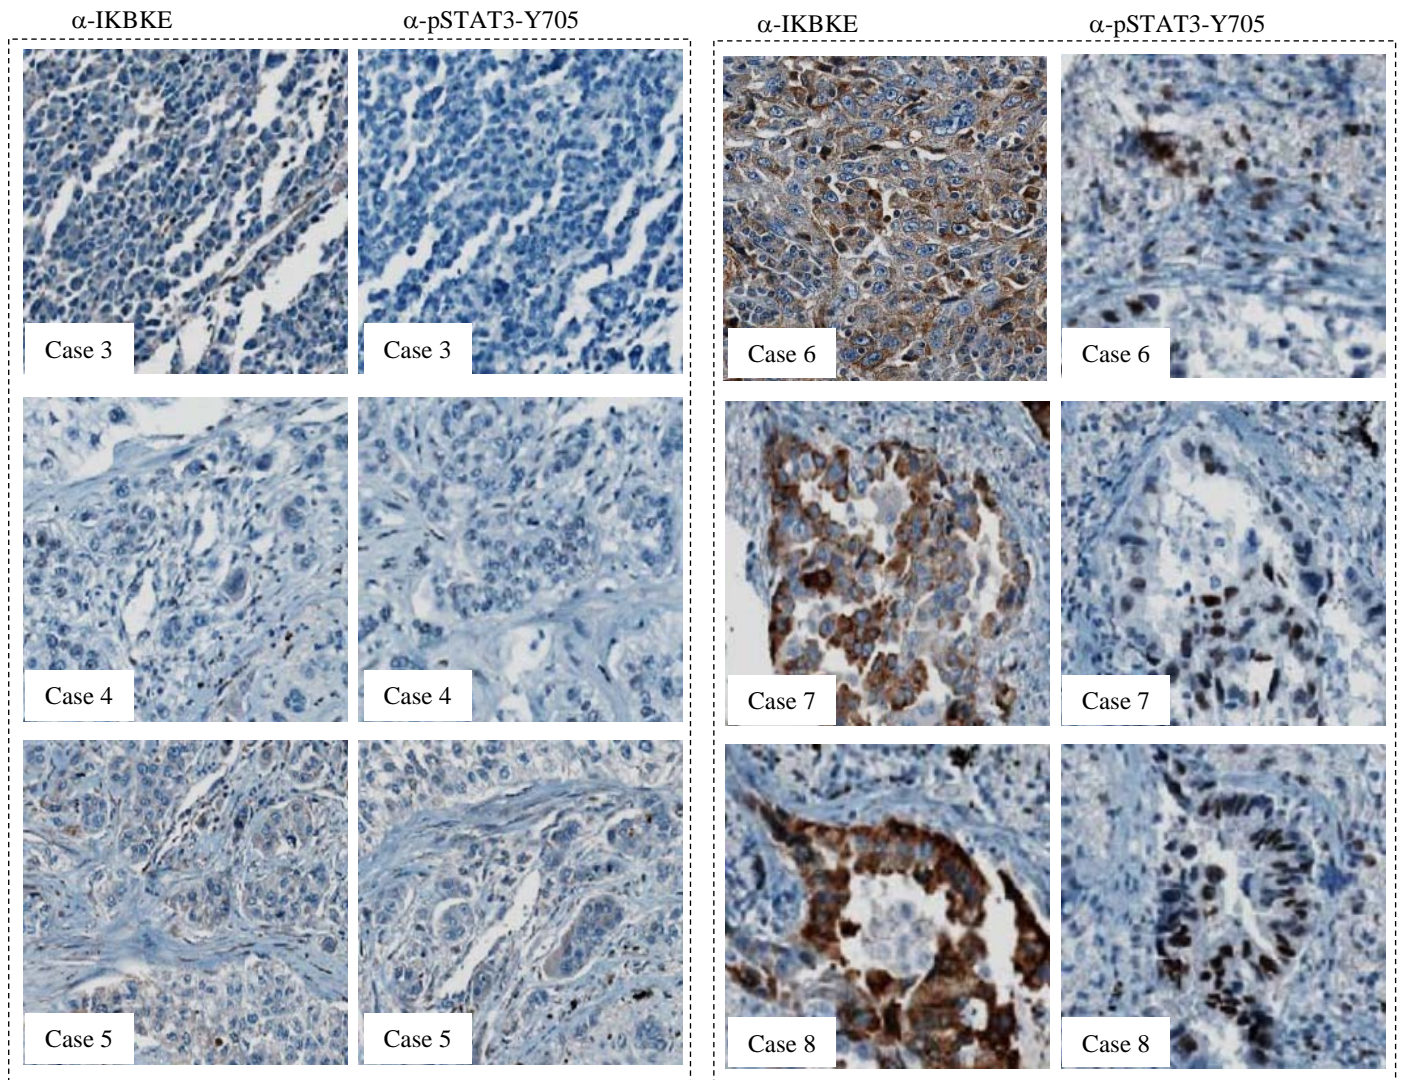

Figure S6

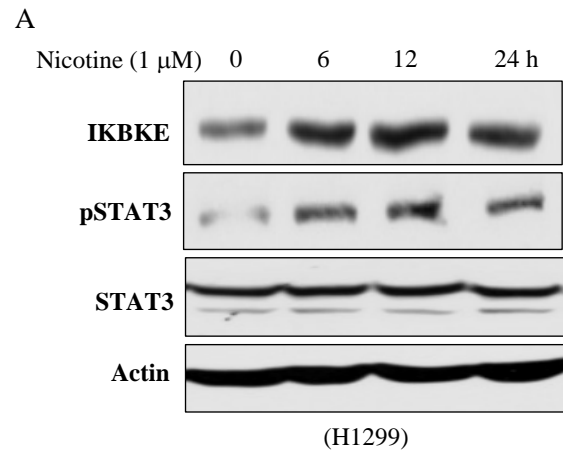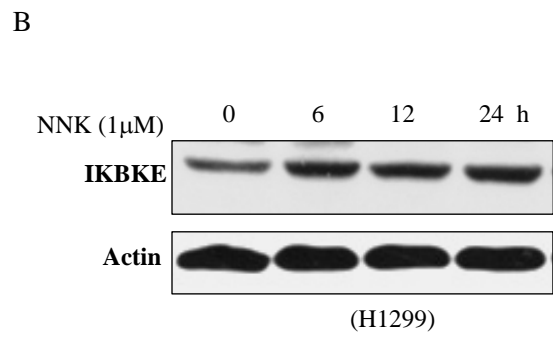



Figure S7

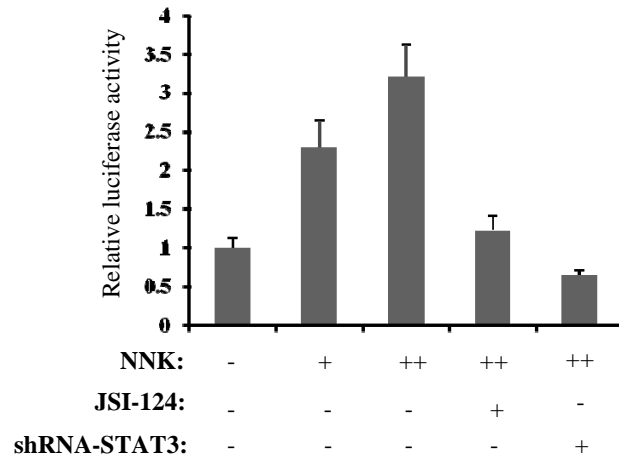

Figure S8

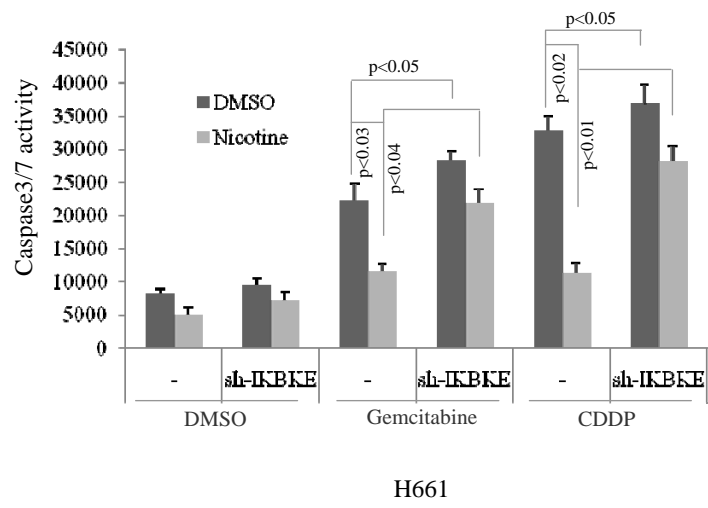

Figure S9

**A**

|                         |   |   |   |   |   |
|-------------------------|---|---|---|---|---|
| Nicotine (1 $\mu$ M):   | - | + | + | + | + |
| JSI-124 (10 $\mu$ M):   | - | - | + | - | + |
| BMS345541 (10 $\mu$ M): | - | - | - | + | + |

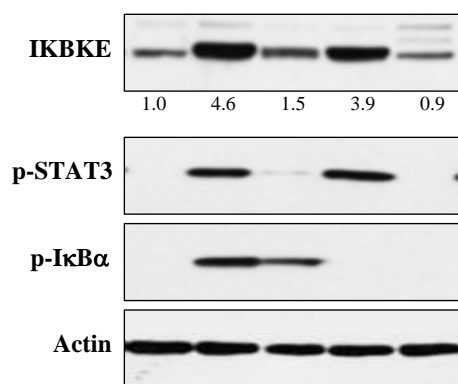

**B**

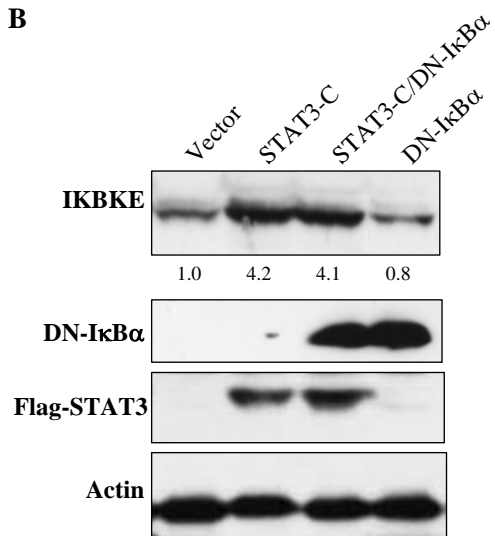

Supplement: NIHMS594995-supplement-Sup_Data.pdf [file NIHMS594995-supplement-Sup_Data.pdf]
